# Supplementary material for: Indices of Extremes: Geographic patterns of change in extremes and associated vegetation impacts under climate intervention
Source: Copernicus journal article supplement (doi:10.5194/egusphere-2022-1), 2022-03-14

GLENS EC Equator Injections minus BASE (left) and RCP8.5 EC minus BASE (right)

Coldest Night (TNn)

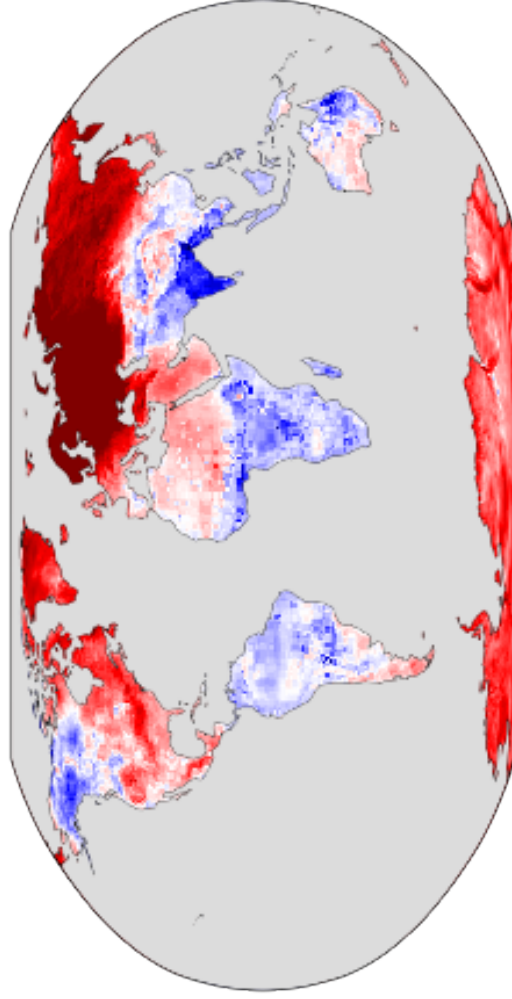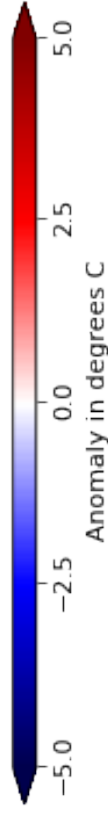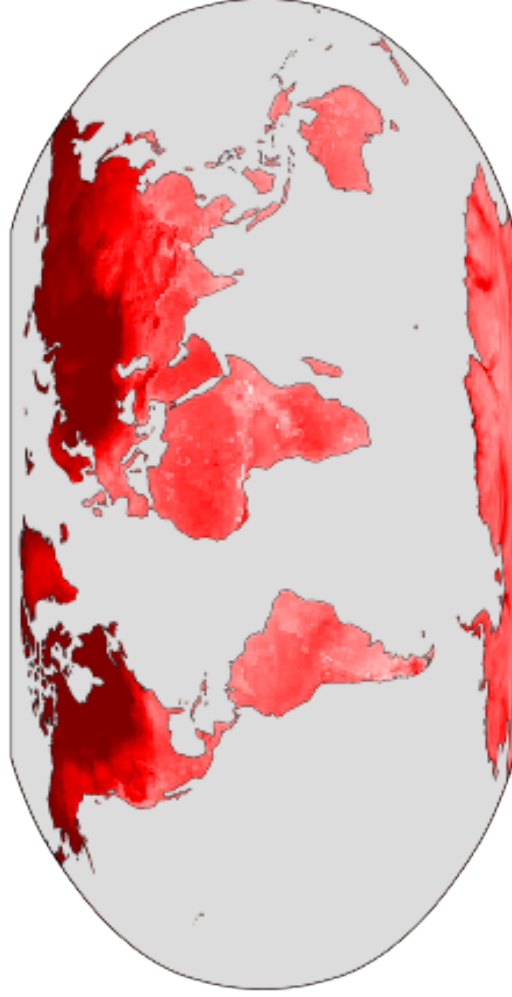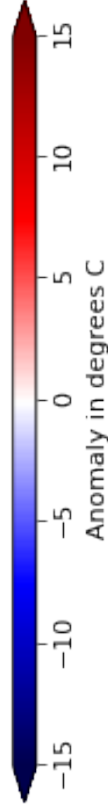

Supplement: Supplementary file [file egusphere-2022-1-AC1-supplement.pdf]
